# Supplementary material for: Modelling of segmented high-performance thermoelectric generators with effects of thermal radiation, electrical and thermal contact resistances
Source: PubMed Central journal article supplement (PMC4823787; doi:10.1038/srep24123), 2016-04-07
Supplement: srep24123-s1.pdf [file srep24123-s1.pdf]

## Supplementary Information

### Modelling of segmented high-performance thermoelectric generators with effects of thermal radiation, electrical and thermal contact resistances

Zhongliang Ouyang and Dawen Li\*

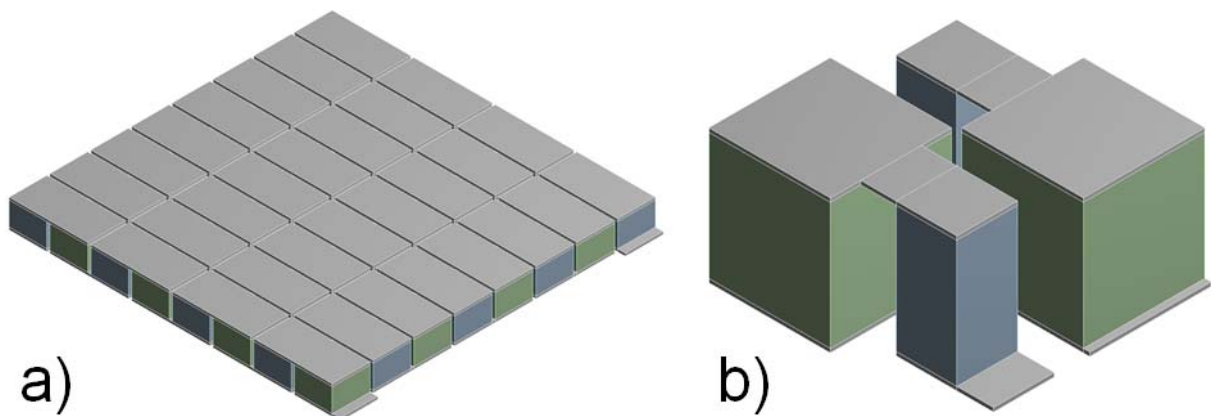

Figure S1 Illustration of a) symmetrical model with 8×8 legs, and b) non-symmetrical model with 2×2 legs used in simulation.

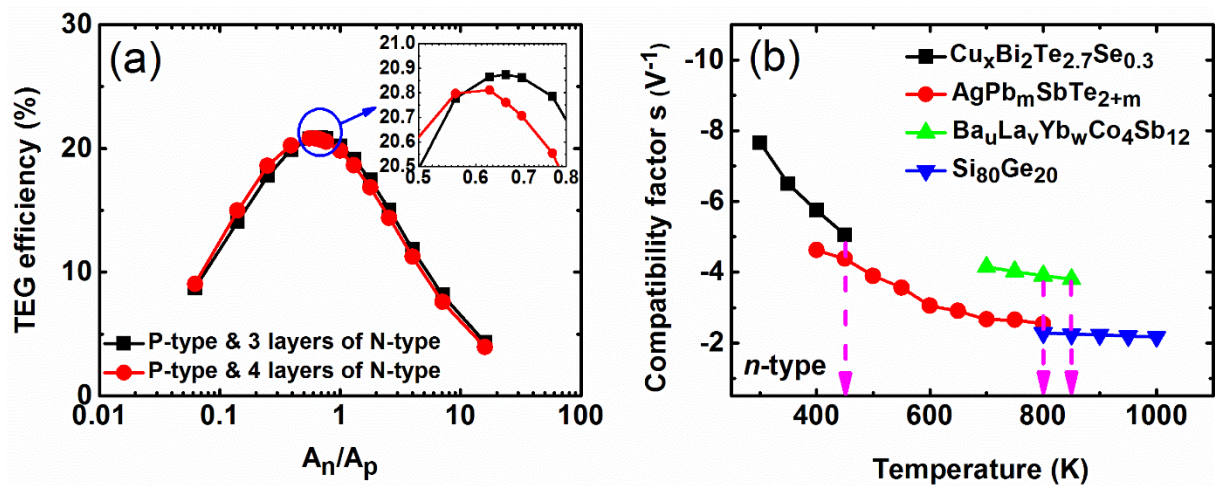

Figure S2 a) TEG Efficiency vs. geometrical ratios of the best p-type teaming with 3 or 4 layers of the strongest n-type TE materials @  $\Delta T = 700$  K. b) Compatibility factors of the  $BaLaYbCo_4Sb_{12}$  layer in comparison with the other three layers.

Table S1 Temperature dependence of resistivities  $\rho$  ( $\times 10^{-5} \Omega \text{ m}$ ) and thermal conductivities  $\kappa$  ( $\text{W m}^{-1} \text{ K}^{-1}$ ) for the used TE materials

|         | p-type                                                                                                                      |          | n-type 1                                                                                        |          | n-type 2            |          | n-type 3                 |          |
|---------|-----------------------------------------------------------------------------------------------------------------------------|----------|-------------------------------------------------------------------------------------------------|----------|---------------------|----------|--------------------------|----------|
|         | 300-400K BiSbTe <sup>1</sup><br>450-500K MgAgSb <sup>2</sup><br>550-800K KPbTeS <sup>3</sup><br>850-1000K SnSe <sup>4</sup> |          | 300-400K CuBiTeSe <sup>5</sup><br>450-800K AgPbSbTe <sup>6</sup><br>850-1000K SiGe <sup>7</sup> |          | YbCoSb <sup>8</sup> |          | Pb(S,Se,Te) <sup>9</sup> |          |
| $T$ (K) | $\rho$                                                                                                                      | $\kappa$ | $\rho$                                                                                          | $\kappa$ | $\rho$              | $\kappa$ | $\rho$                   | $\kappa$ |
| 300     | 0.80                                                                                                                        | 1.20     | 1.00                                                                                            | 1.00     | 0.420               | 2.8      | 0.49                     | 2.18     |
| 350     | 1.05                                                                                                                        | 1.10     | 1.20                                                                                            | 1.01     | 0.455               | 2.8      | 0.56                     | 1.88     |
| 400     | 1.35                                                                                                                        | 1.05     | 1.30                                                                                            | 1.06     | 0.495               | 2.8      | 0.67                     | 1.67     |
| 450     | 2.40                                                                                                                        | 0.75     | 1.33                                                                                            | 1.55     | 0.506               | 2.8      | 0.84                     | 1.50     |
| 500     | 2.20                                                                                                                        | 0.80     | 1.75                                                                                            | 1.45     | 0.543               | 2.8      | 1.06                     | 1.37     |
| 550     | 2.75                                                                                                                        | 0.71     | 2.22                                                                                            | 1.35     | 0.557               | 2.8      | 1.25                     | 1.25     |
| 600     | 3.60                                                                                                                        | 0.64     | 3.13                                                                                            | 1.25     | 0.580               | 2.85     | 1.55                     | 1.15     |
| 650     | 4.45                                                                                                                        | 0.60     | 3.70                                                                                            | 1.17     | 0.615               | 2.90     | 1.90                     | 1.08     |
| 700     | 5.31                                                                                                                        | 0.59     | 4.50                                                                                            | 1.1      | 0.644               | 2.95     | 2.38                     | 1.00     |
| 750     | 5.53                                                                                                                        | 0.59     | 4.76                                                                                            | 1.05     | 0.659               | 3.05     | 3.00                     | 0.97     |
| 800     | 5.75                                                                                                                        | 0.60     | 5.10                                                                                            | 1.05     | 0.679               | 3.10     | 3.50                     | 0.95     |
| 850     | 11.8                                                                                                                        | 0.35     | 6.3                                                                                             | 0.8      |                     |          |                          |          |
| 900     | 11.8                                                                                                                        | 0.35     | 6.3                                                                                             | 0.8      |                     | N/A      |                          |          |
| 950     | 12.7                                                                                                                        | 0.34     | 6.1                                                                                             | 0.83     |                     |          |                          |          |
| 1000    | 14.3                                                                                                                        | 0.33     | 5.9                                                                                             | 0.86     |                     |          |                          |          |

Table S2 Temperature dependence of resistivity ( $\Omega \text{ m}$ ) and thermal conductivity ( $\text{W m}^{-1} \text{ K}^{-1}$ ) for copper contacts

| $T$ (K) | Resistivity | Thermal conductivity |
|---------|-------------|----------------------|
| 300     | 1.73E-08    | 397                  |
| 500     | 3.02E-08    | 388                  |
| 800     | 4.97E-08    | 370                  |
| 1000    | 6.26E-08    | 357                  |

Table S3 Dimensions of non-symmetrical models

| Non-symmetrical models (L=10 mm, 2x2 legs)                   |                                                              |                                            |
|--------------------------------------------------------------|--------------------------------------------------------------|--------------------------------------------|
| Group 1 ( $A_p > A_n$ )<br>$A_p=9.6 \times 9.6 \text{ mm}^2$ | Group 2 ( $A_p < A_n$ )<br>$A_n=9.6 \times 9.6 \text{ mm}^2$ | Total cross-section area ( $\text{mm}^2$ ) |
| $A_n (\text{mm}^2)$                                          | $A_p (\text{mm}^2)$                                          |                                            |
| 2.4×2.4                                                      | 2.4×2.4                                                      | 195.84                                     |
| 3.6×3.6                                                      | 3.6×3.6                                                      | 210.24                                     |
| 4.8×4.8                                                      | 4.8×4.8                                                      | 230.4                                      |
| 6.0×6.0                                                      | 6.0×6.0                                                      | 256.32                                     |
| 7.2×7.2                                                      | 7.2×7.2                                                      | 288                                        |
| 8.4×8.4                                                      | 8.4×8.4                                                      | 325.44                                     |
| 9.6×9.6                                                      | 9.6×9.6                                                      | 368.64                                     |

- 1 Xie, W. *et al.* Identifying the specific nanostructures responsible for the high thermoelectric performance of (Bi, Sb)<sub>2</sub>Te<sub>3</sub> nanocomposites. *Nano Lett.* **10**, 3283-3289 (2010).
- 2 Zhao, H. *et al.* High thermoelectric performance of MgAgSb-based materials. *Nano Energ.* **7**, 97-103 (2014).
- 3 Wu, H. *et al.* Broad temperature plateau for thermoelectric figure of merit ZT>2 in phase-separated PbTe<sub>0.7</sub>S<sub>0.3</sub>. *Nature Comm.* **5**, 4515 (2014).
- 4 Zhao, L.-D. *et al.* Ultralow thermal conductivity and high thermoelectric figure of merit in SnSe crystals. *Nature* **508**, 373-377 (2014).
- 5 Liu, W. S. *et al.* Thermoelectric Property Studies on Cu-Doped n-type Cu<sub>x</sub>Bi<sub>2</sub>Te<sub>2.7</sub>Se<sub>0.3</sub> Nanocomposites. *Adv. Energy Mater.* **1**, 577-587 (2011).
- 6 Hsu, K. F. *et al.* Cubic AgPbmSbTe<sub>2+m</sub>: bulk thermoelectric materials with high figure of merit. *Science* **303**, 818-821 (2004).
- 7 Basu, R. *et al.* Improved thermoelectric performance of hot pressed nanostructured n-type SiGe bulk alloys. *J. Mater. Chem. A* **2**, 6922-6930 (2014).
- 8 Dahal, T. *et al.* Thermoelectric property enhancement in Yb-doped n-type skutterudites Yb<sub>x</sub>Co<sub>4</sub>Sb<sub>12</sub>. *Acta Mater.* **75**, 316-321 (2014).
- 9 Aminorroaya Yamini, S. *et al.* Thermoelectric Performance of n-Type (PbTe)<sub>0.75</sub>(PbS)<sub>0.15</sub>(PbSe)<sub>0.1</sub> Composites. *ACS Appl. Mater. Interfaces* **6**, 11476-11483 (2014).
